# Supplementary material
Source: PubMed Central journal article supplement (PMC4804640)
Supplement: 000351.pdf [file 000351.pdf]

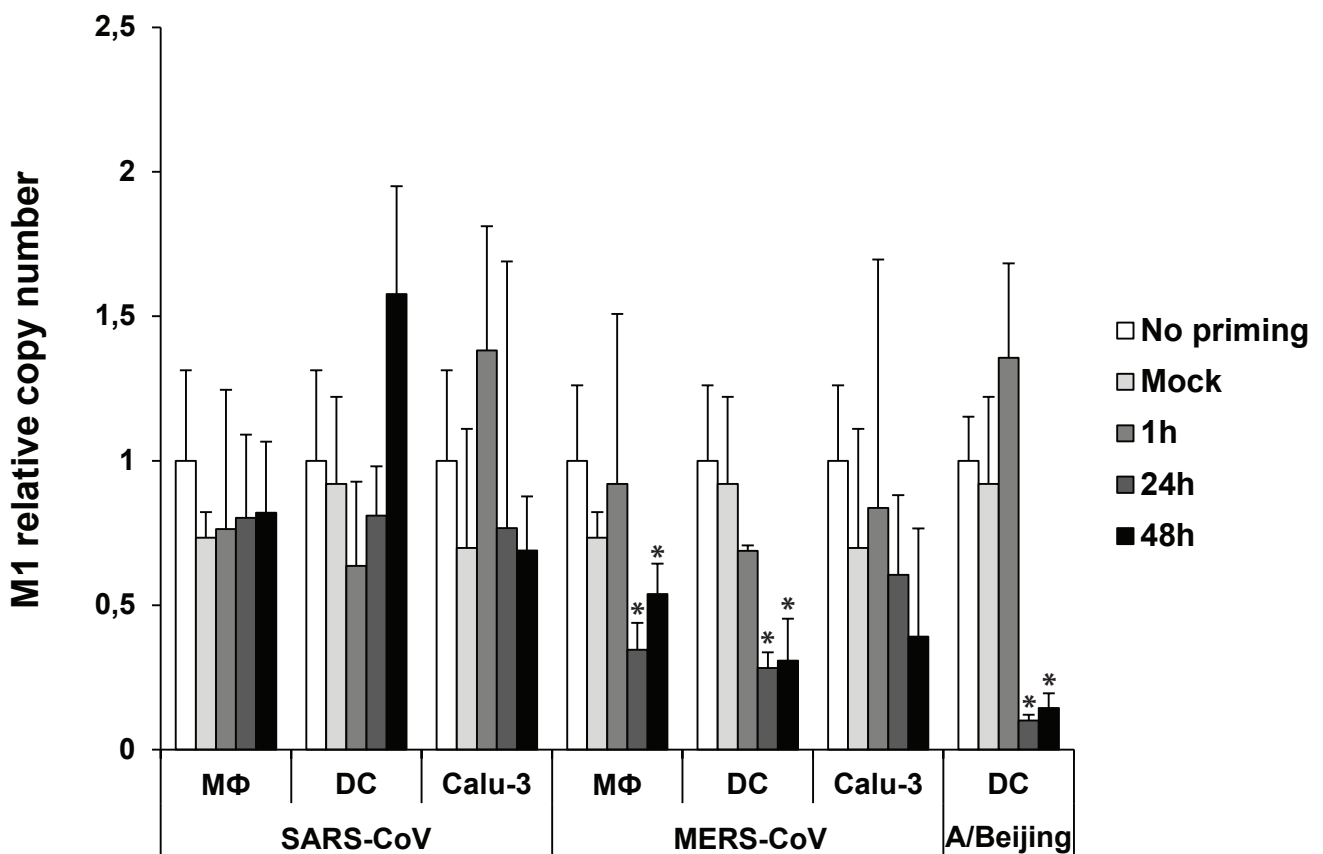

**Supplementary figure 1.** Impact of supernatant priming on A/Beijing/89 replication. Supernatants collected from infection experiments on macrophages, MDDCs and Calu-3 cells at indicated time points were UV-inactivated and used to prime (1 ml/well) A549 cells on 6-well plates for 24h. Primed cells were infected at MOI 1 with A/Beijing/89 for 6h, after which total cellular RNA was isolated and analyzed by qRT-PCR for influenza A M1 RNA expression. M1 values were normalized to 18S rRNA levels and presented here as relative gene expression in relation to non-primed infected samples. \* indicates p-value < 0.05
